# Supplementary material for: MoS2/CoB with Se doping on carbon cloth to drive overall water-splitting in an alkaline electrolyte
Source: Royal Society of Chemistry journal article supplement (doi:10.1039/d0se00864h), 2020-01-01
Supplement: d0se00864h1.pdf [file d0se00864h1.pdf]

## Supporting Information

### **MoS<sub>2</sub>/CoB with Se Doping on Carbon Cloth to Drive Overall Water-splitting in Alkaline Electrolyte**

Min Song<sup>1</sup>, Ying Zhao<sup>1</sup>, Zexing Wu\* Xien Liu \*

State Key Laboratory Base of Eco-chemical Engineering, College of Chemistry and Molecular Engineering, College of Chemical Engineering, Qingdao University of Science & Technology, 53 Zhengzhou Road, 266042, Qingdao, P. R. China

1: Min Song and Ying Zhao contributed equally to this work.

\* Zexing Wu and Xien Liu are corresponding authors of this work.

Figure S1 XRD pattern of MoS<sub>2</sub>/CoB-Se/CC.

Figure S2 SEM images of MoS<sub>2</sub>/CC (a) and MoS<sub>2</sub>/CoB/CC (b).

Figure S3 TEM (a) and S-TEM (b) images of MoS<sub>2</sub>/CoB/CC. (C) EDX elemental mappings of Co K, Co L, Mo K, Mo L, S and B in the prepared MoS<sub>2</sub>/CoB/CC.

Figure S4 EDX result of MoS<sub>2</sub>/CoB/CC.

Figure S5 EDX result of MoS<sub>2</sub>/CoB/CC.

Figure S6 (a) XPS survey spectrum of MoS<sub>2</sub>/CoB-Se/CC. (b) High resolution XPS spectrum of B 1s in the obtained MoS<sub>2</sub>/CoB-Se/CC.

Figure S7 LSVs of MoS<sub>2</sub>/CoB/CC with different molar ratio of Mo and Co for HER (a) and OER (b). (c) Overpotentials to drive 100 mA cm<sup>-2</sup> of the prepared MoS<sub>2</sub>/CoB/CC.

Figure S8 LSVs of MoS<sub>2</sub>/CoB-Se/CC with different molar ratio of Mo and Se for HER (a) and OER (b). (c) Overpotentials to drive 100 mA cm<sup>-2</sup> of the prepared MoS<sub>2</sub>/CoB-Se/CC.

Figure S9 CVs of MoS<sub>2</sub>/CoB/CC (a) and MoS<sub>2</sub>/CoB-Se/CC (b) with various sweeping rates. (c) Linear fitting of scan rates with capacitive current densities of the prepared catalysts

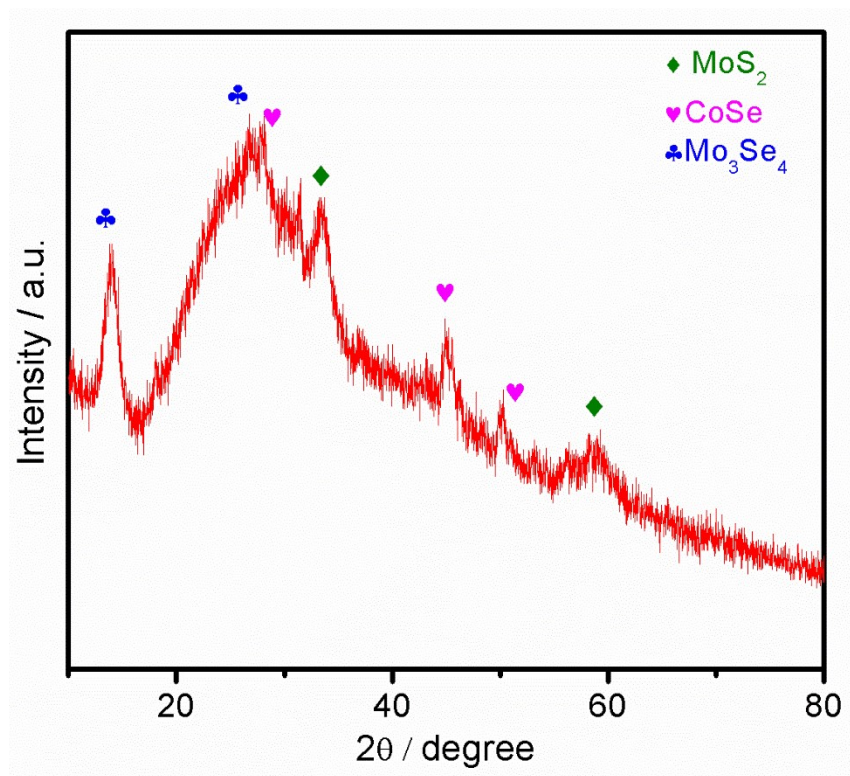

Figure S1 XRD pattern of MoS<sub>2</sub>/CoB-Se/CC.

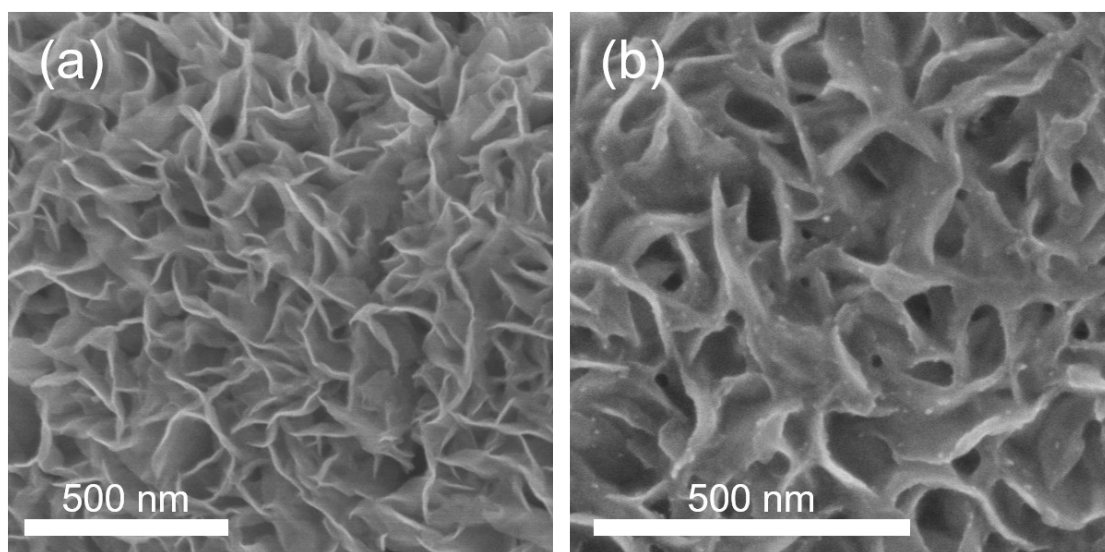

Figure S2 SEM images of MoS<sub>2</sub>/CC (a) and MoS<sub>2</sub>/CoB/CC (b).

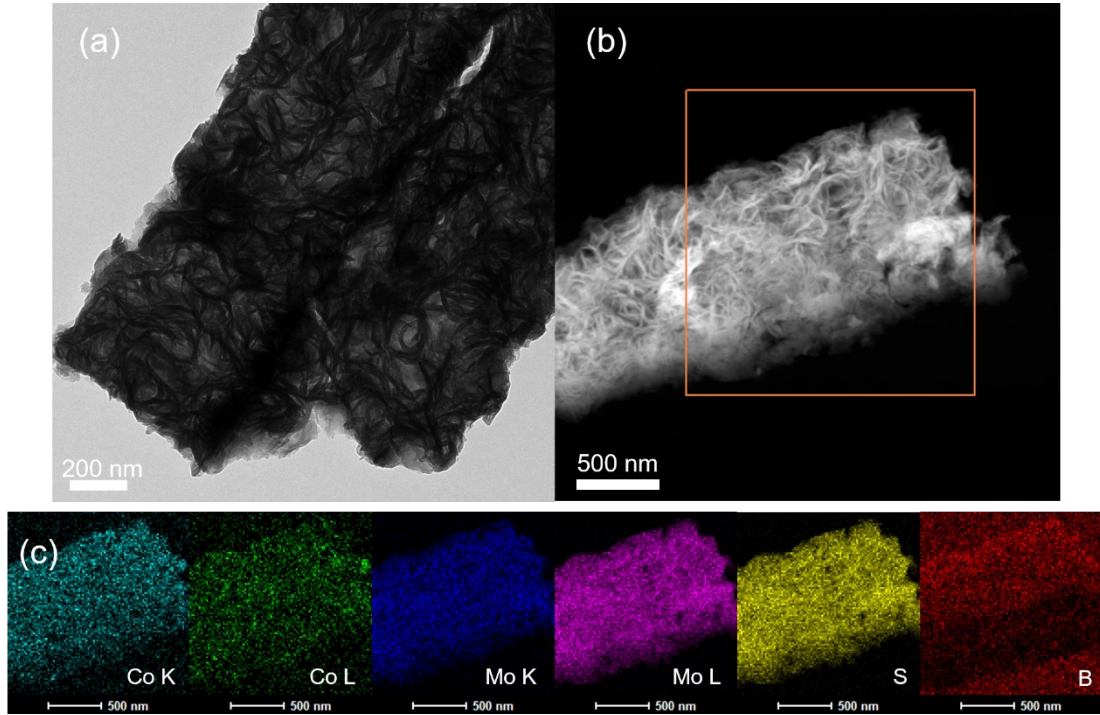

Figure S3 TEM (a) and S-TEM (b) images of  $\text{MoS}_2/\text{CoB}/\text{CC}$ . (C) EDX elemental mappings of Co K, Co L, Mo K, Mo L, S and B in the prepared  $\text{MoS}_2/\text{CoB}/\text{CC}$ .

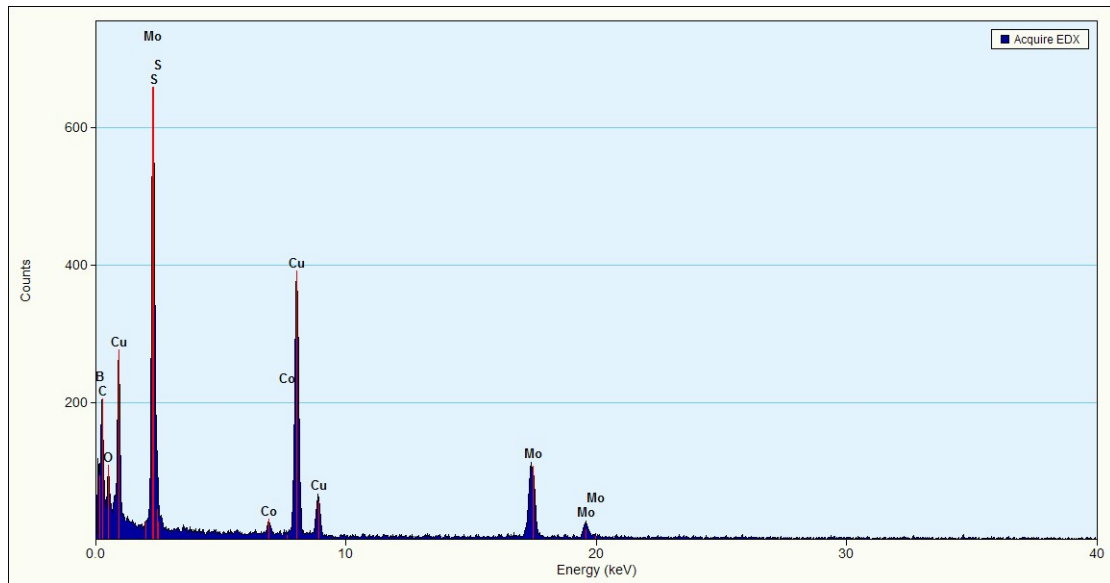

Figure S4 EDX result of  $\text{MoS}_2/\text{CoB}/\text{CC}$ .

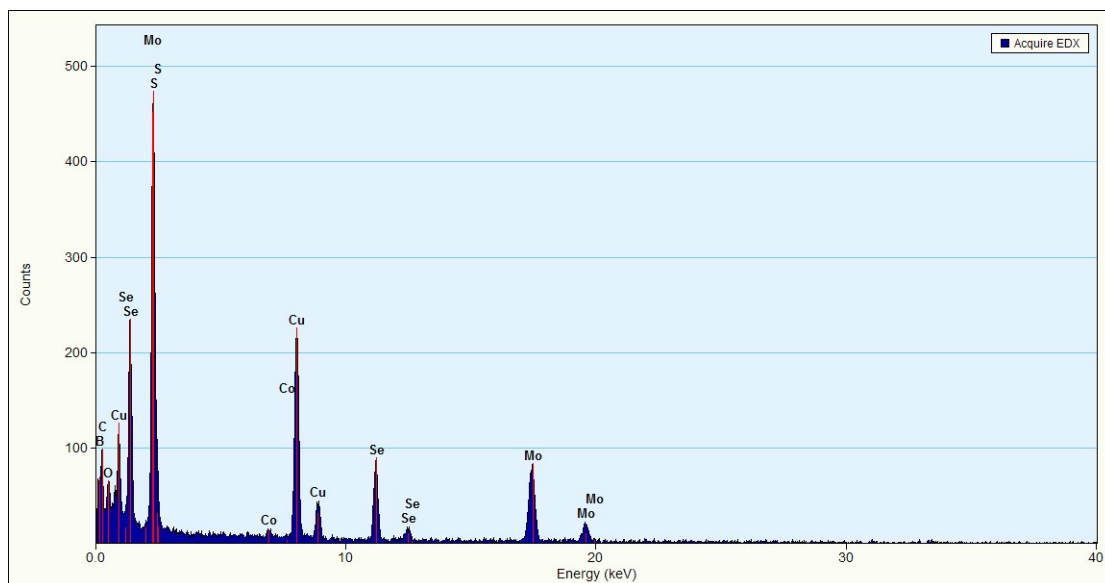

Figure S5 EDX result of MoS<sub>2</sub>/CoB/CC.

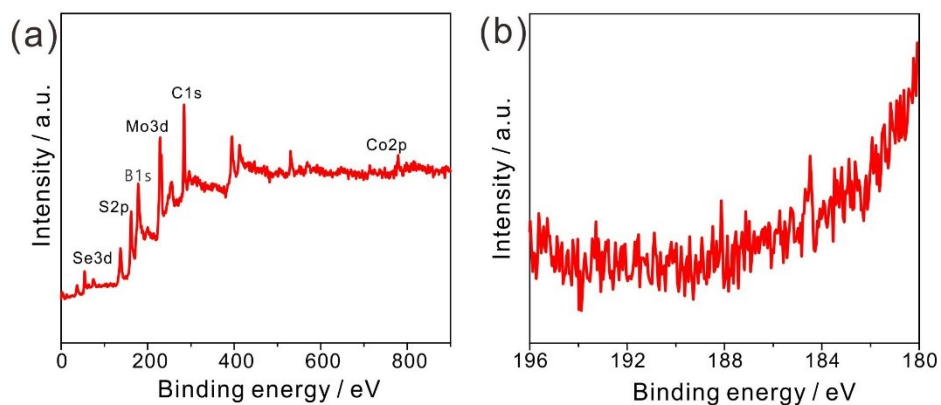

Figure S6 (a) XPS survey spectrum of MoS<sub>2</sub>/CoB-Se/CC. (b) High resolution XPS spectrum of B 1s in the obtained MoS<sub>2</sub>/CoB-Se/CC.

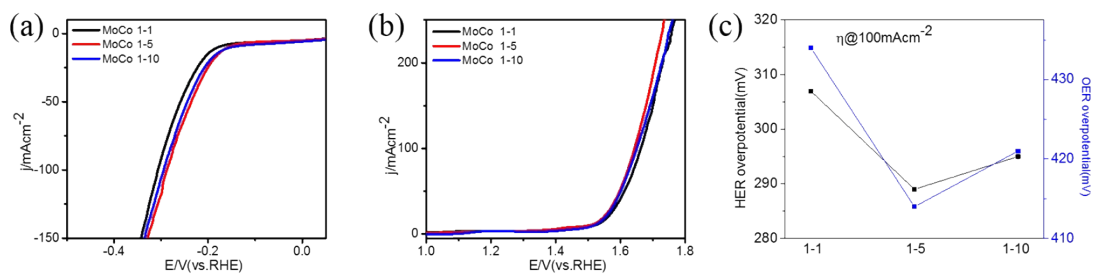

Figure S7 LSVs of MoS<sub>2</sub>/CoB/CC with different molar ratio of Mo and Co for HER (a) and OER (b). (c) Overpotentials to drive 100 mA cm<sup>-2</sup> of the prepared MoS<sub>2</sub>/CoB/CC.

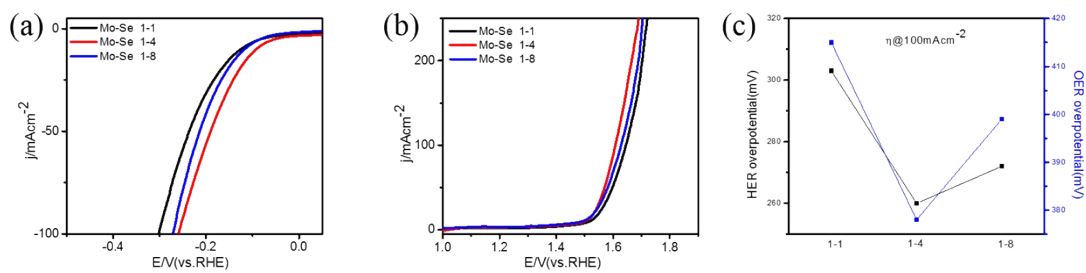

Figure S8 LSVs of MoS<sub>2</sub>/CoB-Se/CC with different molar ratio of Mo and Se for HER (a) and OER (b). (c) Overpotentials to drive 100 mA cm<sup>-2</sup> of the prepared MoS<sub>2</sub>/CoB-Se/CC.

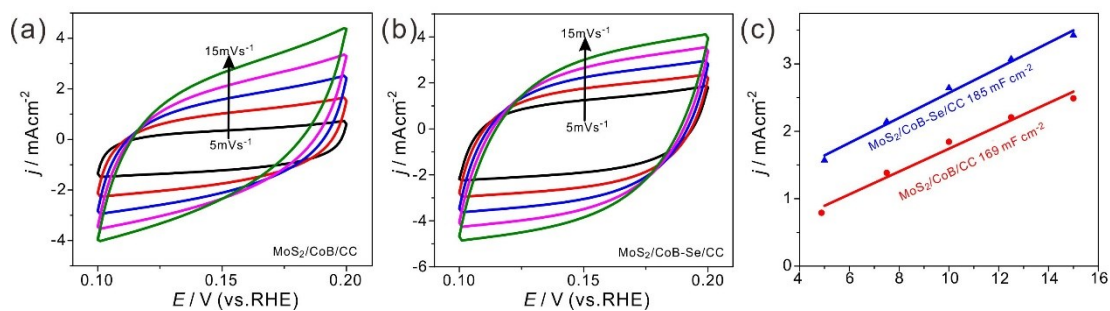

Figure S9 CVs of MoS<sub>2</sub>/CoB/CC (a) and MoS<sub>2</sub>/CoB-Se/CC (b) with various sweeping rates. (c) Linear fitting of scan rates with capacitive current densities of the prepared catalysts.
